# Supplementary material
Source: PubMed Central journal article supplement (PMC1502480)

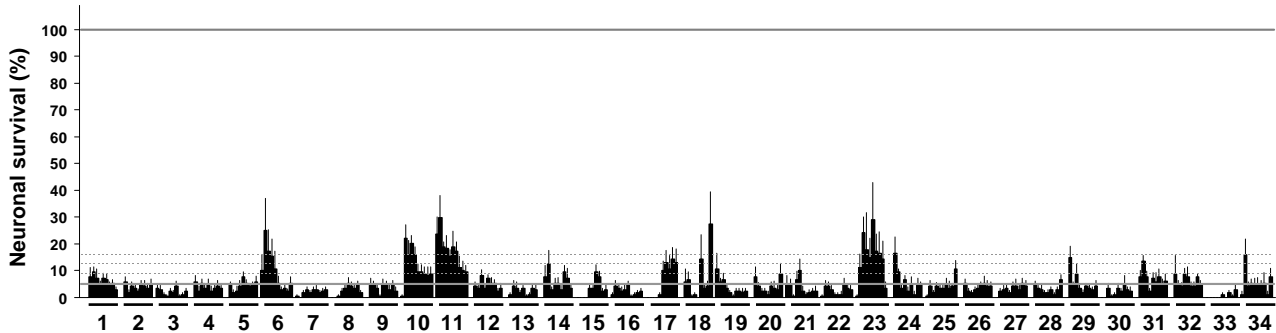

Supplement: pnas_0600930103_1.pdf [file pnas_0600930103_1.pdf]

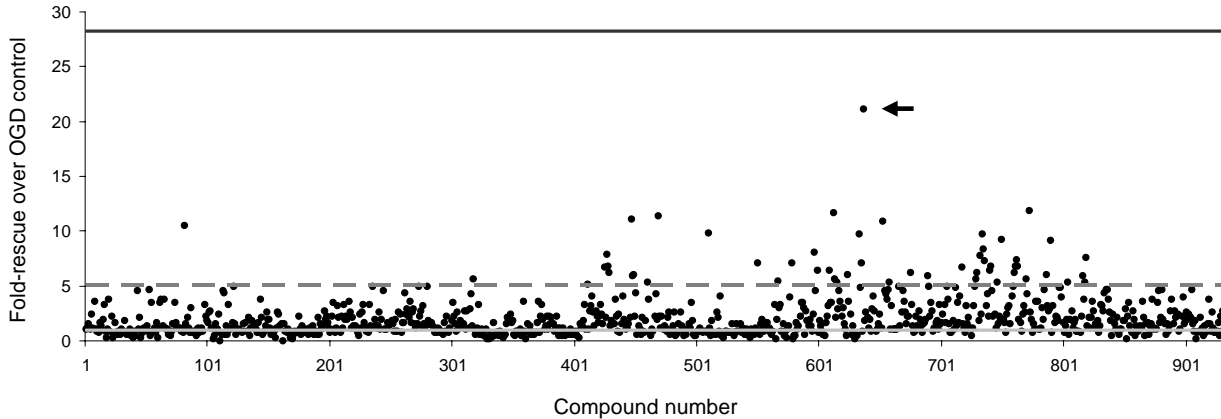

Supplement: pnas_0600930103_2.pdf [file pnas_0600930103_2.pdf]

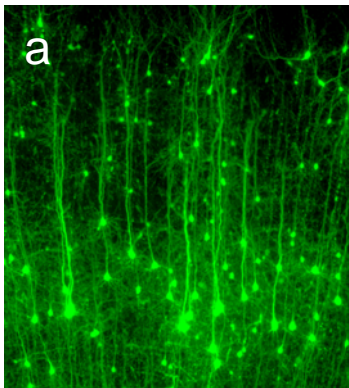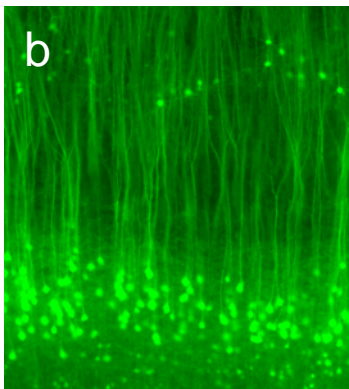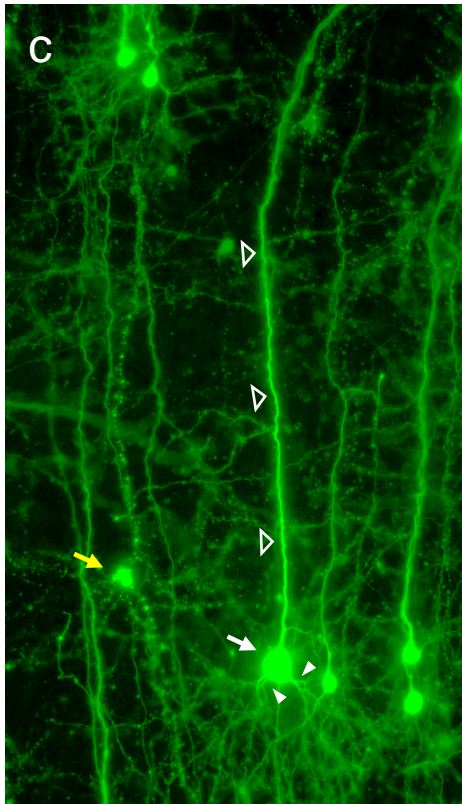

Supplement: pnas_0600930103_3.pdf [file pnas_0600930103_3.pdf]
